# Supplementary material for: Identification of familial networks reveals sex-specific density dependence in the dispersal and reproductive success of an endangered ungulate
Source: Frontiers journal article supplement (doi:10.3389/fevo.2022.956834), 2022-12-14
Supplement: Table_1.DOCX [file Table_1.DOCX]

Supplementary Material

# Study area, land cover and disturbance data

## Study area

Due to the large size of Boreal Plains and the large variation in habitat types, ecological conditions, anthropogenic disturbance and fire regime, the Government of Saskatchewan has developed three caribou administration zones representing important ecological differences (SK2 West, SK2 Central, and SK2 East, hereafter referred to as SK West, SK Central, and SK East; Saskatchewan Ministry of Environment, 2019b), which do not represent discrete population boundaries, as caribou distribution is continuous across the range (Priadka et al., 2019). SK West and SK Central are characterized by low rolling forested hills and plains interspersed by bogs, fens, marshes, and lakes, with a relatively large proportion of high value upland (pine-lichen forests) and lowland (peatlands) caribou habitat (Saskatchewan Ministry of Environment, 2019b). SK West has the highest combined levels of anthropogenic disturbance and wildfire, while SK Central has the highest level of anthropogenic disturbance with an intermediate fire cycle slightly less than SK West (Saskatchewan Ministry of Environment, 2019b, 2019a).

SK West has an extensive network of permanent and non-permanent roads from forestry activities, along with oil and gas activities including seismic exploration and oil and gas extraction in the south, and historic oil sands exploration in the northwest (Saskatchewan Ministry of Environment, 2019a). Slightly increasing levels of forestry are expected in the future; current active natural gas extraction will continue, but new natural gas development is not expected in SK West (Saskatchewan Ministry of Environment, 2019a). Forestry is the primary source of anthropogenic disturbance in SK Central, with an extensive network of permanent and non-permanent roads, with slightly increasing levels of forestry expected in the future (Saskatchewan Ministry of Environment, 2019b).


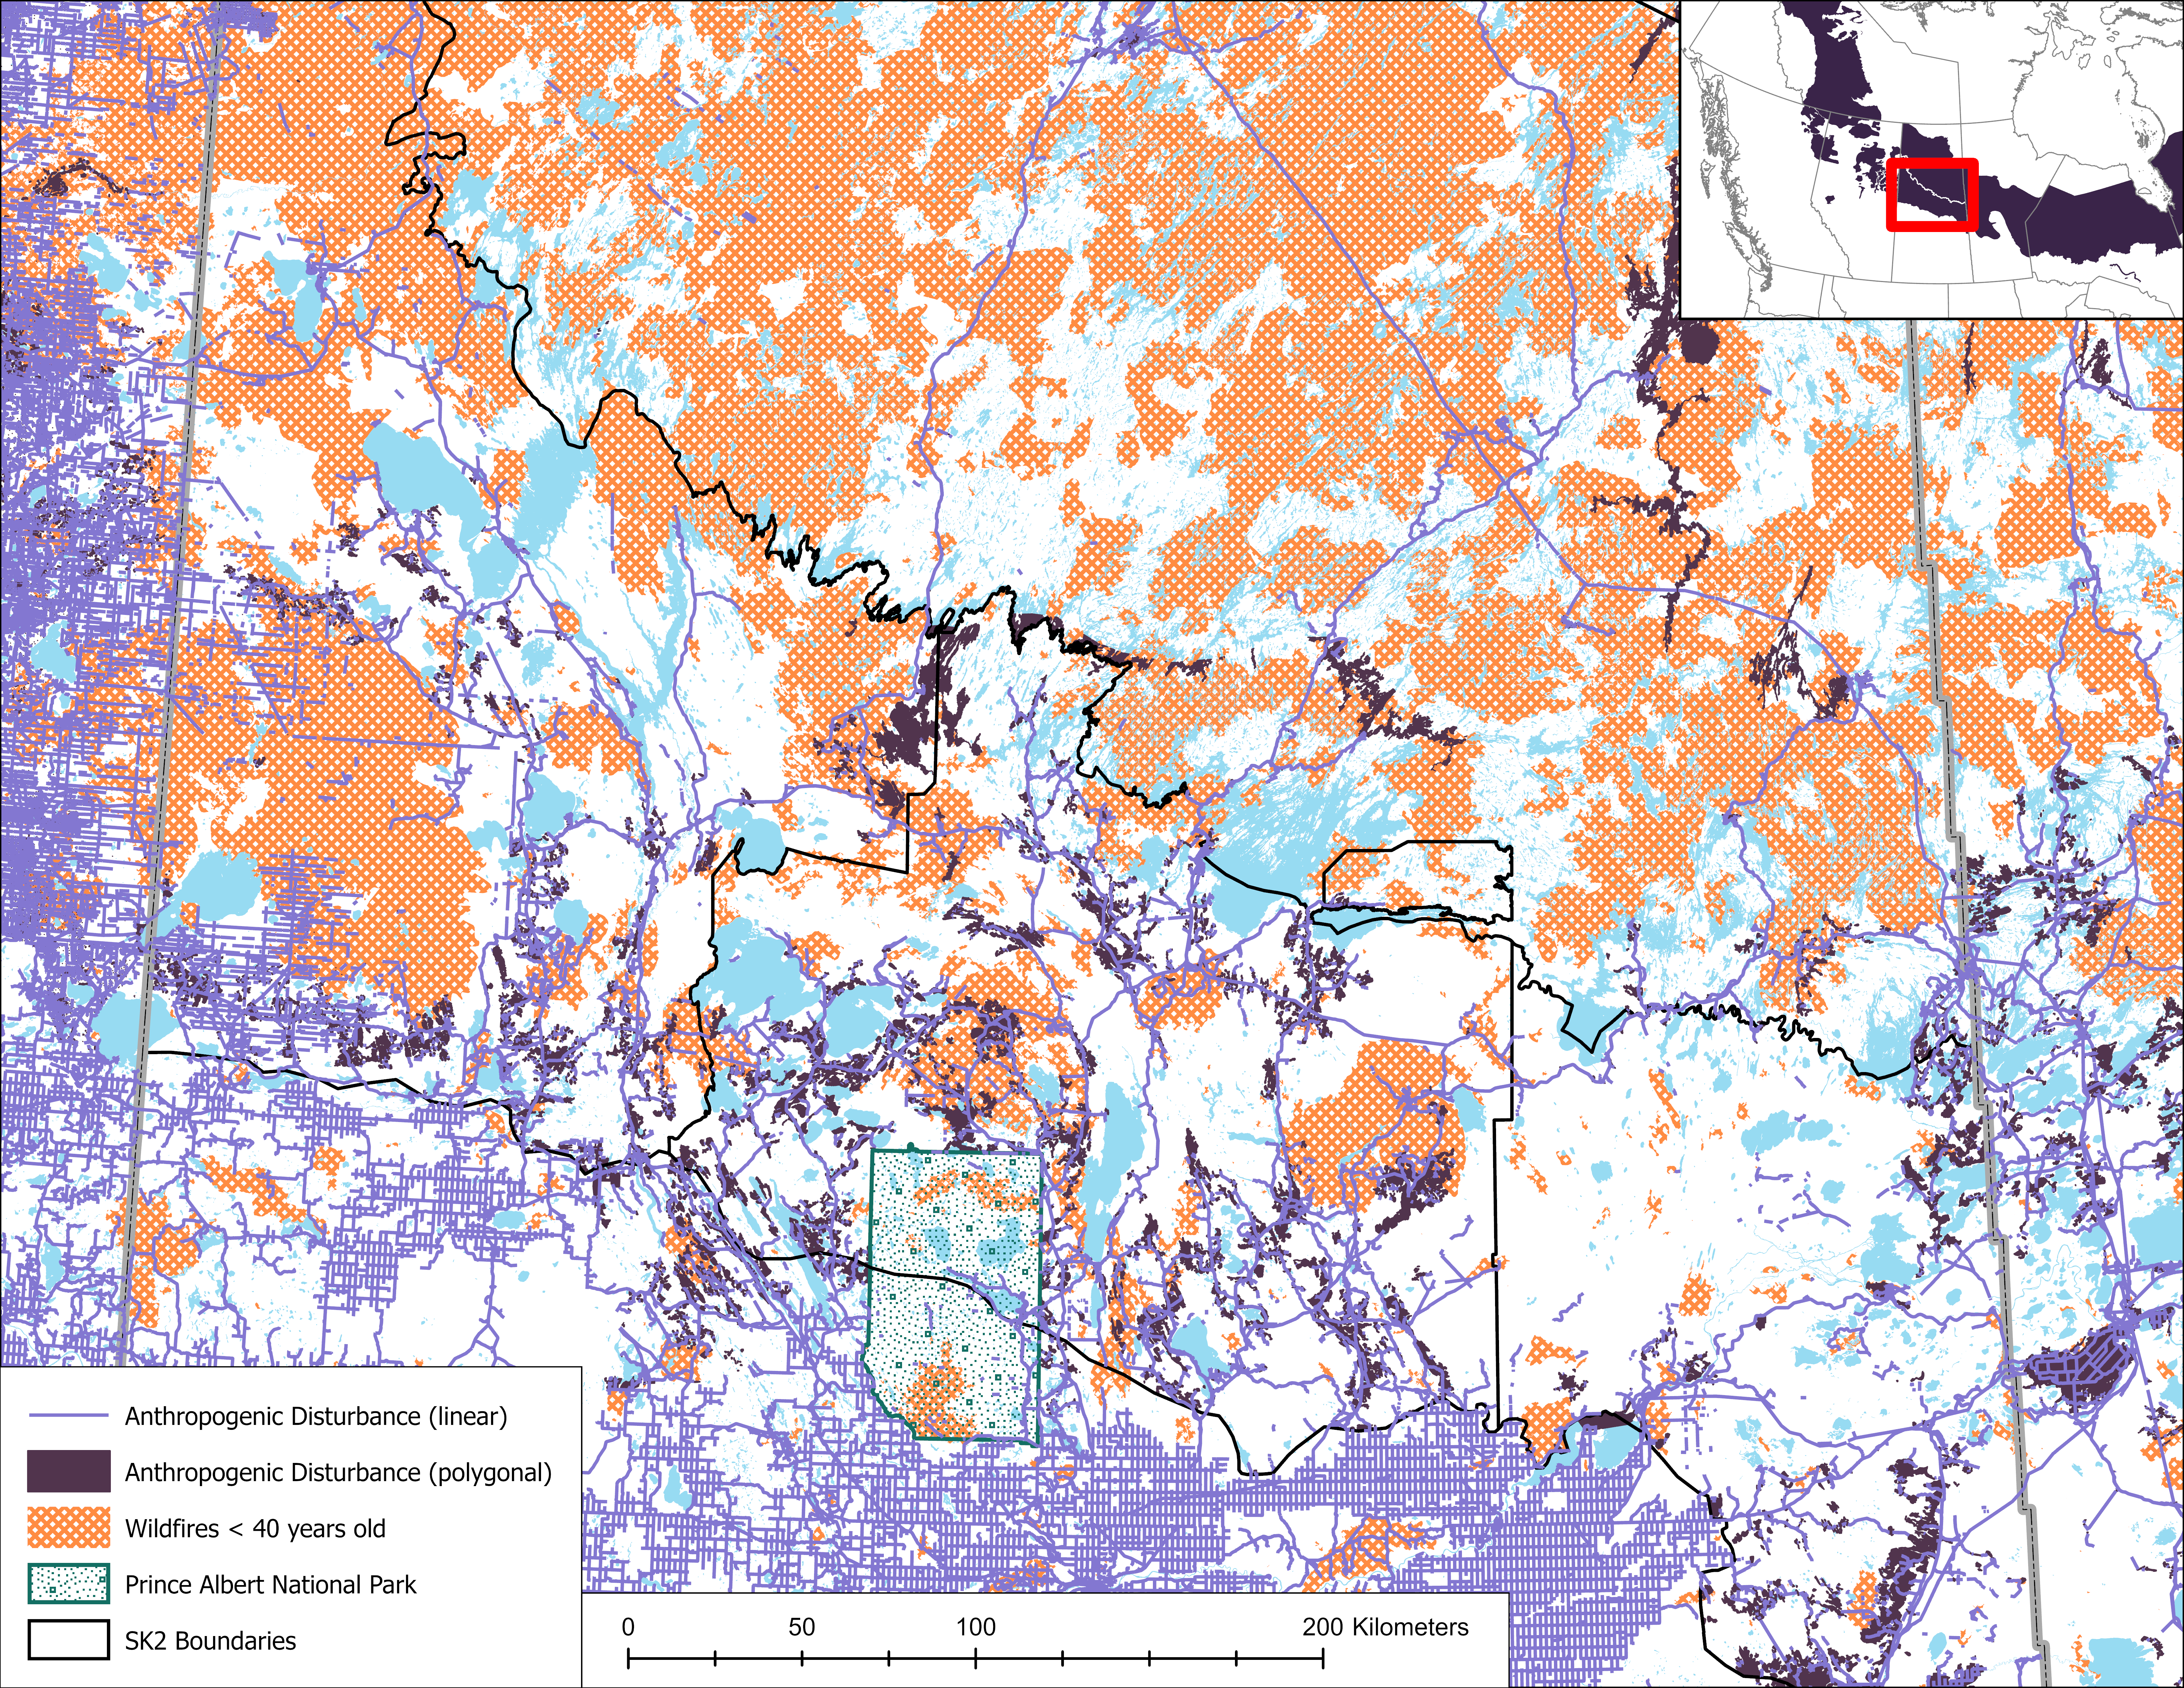


**Figure S1.1.** Anthropogenic and fire disturbance in the Saskatchewan Boreal Plains caribou range. Linear disturbance includes roads, railways, powerlines, pipelines, and seismic exploration lines. Polygonal disturbances include forestry cut-blocks, mines, reservoirs, built-up areas, well sites, and other features. Inset map shows location of Saskatchewan Boreal Plains caribou range within the distribution of boreal caribou in Canada. Base map is land cover classification (Environment & Climate Change Canada 2015).

## Land cover and disturbance data

We used land cover types from the 30m 2015 Land Cover of Canada (Natural Resources Canada, 2020) that we determined to be the best land cover classes for determining boreal caribou density. We predicted wetland and needleleaf forests to have higher densities of caribou, while deciduous and grass and shrub would have lower densities of caribou. The LCC data was rescaled to 1km² spatial resolution, and the value in each 1km² grid cell represents the fraction of that class present per cell.

Linear anthropogenic disturbances also leads to habitat fragmentation that impedes movement and access to available resources, as well as providing predators easier access into formerly inaccessible habitats (Saskatchewan Ministry of Environment, 2019b). Boreal caribou require large range areas comprised of undisturbed habitat, and polygonal disturbance may reduce the size of suitable habitat patches, and reduce connectivity between habitats (Environment Canada, 2012; Saskatchewan Ministry of Environment, 2019b).

Wetland is comprised of the LCC Wetland cover type: areas dominated by perennial herbaceous and woody wetland vegetation which is influenced by the water table at or near surface over extensive periods of time. This includes marshes, swamps, bogs, mangroves, etc. We predicted that these classes would have medium to high densities of caribou. Wetland was included in the analysis but was not significant in any of the models. This was in part likely due to the reduced class accuracy of wetlands in the land cover product relative to other classes (Latifovic et al., 2017).

Needleleaf is comprised of two LCC cover types: Temperate or sub-polar needleleaf forest (forests with the tree crown cover containing at least 75% of needleleaf species), and sub-polar taiga needleleaf forest (forests with shrubs and lichens present in the understory, and crown cover containing at least 75% needleleaf species). We predicted that these classes would have high densities of caribou.

Deciduous/mixed forest is comprised of two LCC cover types: Temperate or sub-polar broadleaf deciduous forest (forests with greater than 75% of tree crown cover represented by deciduous species) and Mixed Forest (forests where neither needleleaf nor broadleaf tree species occupy more than 75% of total tree cover, but are co-dominant). We predicted that these classes would have lower densities of caribou.

Grass and shrub is comprised of two LCC cover types: grassland (areas dominated by graminoid or herbaceous vegetation, generally accounting for greater than 80% of total vegetation cover) and shrubland (areas dominated by woody perennial plants with persistent woody stems less than 3 meters tall and typically greater than 20% of total vegetation). We predicted that these classes would have lower densities of caribou.

The quality of boreal caribou habitat was evaluated by ranking ecosites and mapping habitat potential within the provincial forest of central Saskatchewan (Saskatchewan Ministry of Environment, 2019b). Forest ecosite habitat potential ranks were assigned by evaluating ecosite’s potential to provide forage, refuge and calving habitat by a panel of biologists with expertise on boreal caribou habitat use in Saskatchewan (Saskatchewan Ministry of Environment, 2019b). Forest ecosite habitat potential values were mapped at a 10m x 10m spatial resolution. Dispersal in highly mobile terrestrial mammals such as boreal caribou occurs over large spatial extents, and these species may be more influenced by patterns evident at broader spatial extents than by fine-grained landscape variation (Galpern et al., 2012); therefore the habitat potential data was rescaled to 1km² spatial resolution, and the value in each 1km² grid cell represents the mean habitat potential value. Habitat potential was included in the models but results are not included as habitat potential was not a significant covariate in any density models.

We used the National Road Network (NRN) and CanVec land, man-made, resource management and transport linear features to create the distance to roads and distance to linear features layers. The linear feature layer includes roads, railways, trails, seismic lines, protection structures (dike, levees, etc.), pipelines, and power lines. Caribou are known to avoid habitats within several kilometres of human development (Dyer, 1999; Environment Canada, 2011; Hebblewhite et al., 2010; Mahoney & Schaefer, 2002; Weir et al., 2007). We tested the effects of linear features by creating a distance to roads variable and a distance to all linear features variable.

## References

Dyer, S. J. (1999). Movement and distribution of woodland caribou (*Rangifer tarandus caribou*) in response to industrial development in northeastern Alberta [Master’s thesis]. [Edmonton (AB)]: University of Alberta.

Environment Canada. (2011). Scientific assessment to inform the identification of critical habitat for woodland caribou (*Rangifer tarandus caribou*), boreal population, in Canada: 2011 update. Ottawa. xi + 138 pp.

Environment Canada. (2012). Recovery strategy for the woodland caribou (*Rangifer tarandus caribou*), Boreal population, in Canada. Species at Risk Act Recovery Strategy Series. Ottawa. xi + 138 pp.

Environment, & Climate Change Canada. (2015). Data from: 2015 - Anthropogenic disturbance footprint within boreal caribou ranges across Canada - as interpreted from 2015 Landsat satellite imagery. Environment and Climate Change Canada. Available from <<https://open.canada.ca/data/en/dataset/a71ab99c-6756-4e56-9d2e-2a63246a5e94>>.

Galpern, P., Manseau, M., and Wilson, P. (2012). Grains of connectivity: Analysis at multiple spatial scales in landscape genetics. Mol. Ecol., 21, 3996–4009. doi: [10.1111/j.1365-294X.2012.05677.x](https://doi.org/10.1111/j.1365-294X.2012.05677.x)

Hebblewhite, M., Musiani, M., DeCesare, N., Hazenberg, S., Peters, W., Robinson, H., and Weckworth, B. (2010). Linear features, forestry and wolf predation and other prey in west central Alberta. Final report to the Petroleum Technology Alliance of Canada (PTAC).

Latifovic, R., Pouliot, D., and Olthof, I. (2017). Circa 2010 land cover of Canada: Local optimization methodology and product development. Remote Sens., 9, 1098. doi: [10.3390/rs9111098](https://doi.org/10.3390/rs9111098).

Mahoney, S. P., and Schaefer, J. A. (2002). Hydroelectric development and the disruption of migration in caribou. Biol. Conserv., 107, 147–153. doi: [10.1016/S0006-3207(02)00052-6](https://doi.org/10.1016/S0006-3207(02)00052-6).

Natural Resources Canada. Data from: 2015 land cover of Canada. Natural Resources Canada. (2020). Available from <<https://open.canada.ca/data/en/dataset/4e615eae-b90c-420b-adee-2ca35896caf6>>.

Priadka, P., Manseau, M., Trottier, T., Hervieux, D., Galpern, P., McLoughlin, P. D., and Wilson, P. J. (2019). Partitioning drivers of spatial genetic variation for a continuously distributed population of boreal caribou: Implications for management unit delineation. Ecol. Evol. 9, 141–153. doi: [10.1002/ece3.4682](https://doi.org/10.1002/ece3.4682).

Saskatchewan Ministry of Environment. (2019a). Draft range plan for woodland caribou in Saskatchewan: Boreal plain ecozone, SK2 West Caribou Administrative Unit. Saskatchewan Ministry of Environment.

Saskatchewan Ministry of Environment. (2019b). Range plan for woodland caribou in Saskatchewan: Boreal plain ecozone, SK2 Central Caribou Administrative Unit. Saskatchewan Ministry of Environment.

Weir, J. N., Mahoney, S. P., McLaren, B., and Ferguson, S. H. (2007). Effects of mine development on woodland caribou *Rangifer tarandus* distribution. Wildlife Biol., 13, 66–74. doi: [10.2981/0909-6396(2007)13[66:EOMDOW]2.0.CO;2](https://doi.org/10.2981/0909-6396(2007)13%5B66:EOMDOW%5D2.0.CO;2).

# Density modeling

SCR models consist of a submodel for the distribution of animals in the area of study (population density, *D*), and a submodel for the detection process, given the detection probability (the intercept of the detection function, *g0*) and given a parameter for scaling the detection function (the spatial extent of an individual’s use of the landscape - ; Borchers & Efford, 2008; Efford et al., 2009).

Habitat and habitat potential covariates were resampled to 1 km2 spatial resolution, with the value in each 1 km2 grid cell representing the fraction of the 30 m cells for the selected class or classes. Disturbance data was extracted from the National Road Network (NRN) and CanVec land, man-made, resource management and transport linear features (National Resources Canada, 2019; Statistics Canada, 2015). Distance to disturbances was calculated in ArcGIS (ESRI Inc., 2018) and a spatial surface of distance to roads and distance to linear features (including roads) was calculated for the entire Boreal Plains.

We checked for correlation between all spatial covariates using Pearson’s correlation coefficient using the raster package in R (Hijmans, 2022). Distance to roads and distance to linear features were highly correlated (Table S2.1), which was expected as the distance to linear features covariate includes roads. Only one of these distance covariates were used in a density model.

**Table S2.1.** Pearson’s correlation matrix for spatial covariates used in density modeling. Bold text indicates correlated covariates.

|  | Distance to roads | Distance to linear features | Average habitat potential | Wetland | Conifer | Deciduous / mixed forest | Grassland / Shrubland |
| --- | --- | --- | --- | --- | --- | --- | --- |
| Distance to roads | - | **0.850** | 0.333 | 0.063 | 0.117 | -0.333 | 0.202 |
| Distance to linear features |  | - | 0.262 | -0.01 | 0.109 | -0.235 | 0.133 |
| Average habitat potential |  |  | - | 0.217 | 0.309 | **-0.645** | 0.199 |
| Wetland |  |  |  | - | -0.249 | -0.211 | -0.251 |
| Conifer |  |  |  |  | - | -0.241 | -0.335 |
| Deciduous / mixed forest |  |  |  |  |  | - | -0.242 |

**Table S2.2.** Model selection table for spatially explicit capture-recapture models to predict the density of boreal caribou in the Saskatchewan Boreal Plains. Detection model for all models is ~ t + bk, ~ t + bk.

| Modela | AIC | AIC | logLik | weight |
| --- | --- | --- | --- | --- |
| D~session + needleleaf + deciduous.mixed + road_distance | 5144.350 | 0.000 | -2559.595 | 0.9901 |
| D~session + needleleaf + deciduous.mixed + grass.shrub | 5153.557 | 9.207 | -2564.199 | 0.0099 |
| D~session + deciduous.mixed | 5161.660 | 17.310 | -2570.424 | 0.0000 |
| D~session + needleleaf + deciduous.mixed | 5163.491 | 19.141 | -2570.256 | 0.0000 |
| D~session + needleleaf + road_distance | 5254.073 | 109.723 | -2615.548 | 0.0000 |
| D~session + road_distance | 5255.572 | 111.222 | -2617.380 | 0.0000 |
| D~session + needleleaf | 5280.402 | 136.052 | -2629.795 | 0.0000 |
| D~session | 5281.745 | 137.395 | -2631.542 | 0.0000 |
| D~session + grass.shrub | 5283.496 | 139.146 | -2631.342 | 0.0000 |

a session = survey year; needleleaf = good-quality habitat (needleleaf forest); deciduous.mixed = poor-quality habitat (deciduous forest and mixed forest); road-distance = distance to roads (in metres).


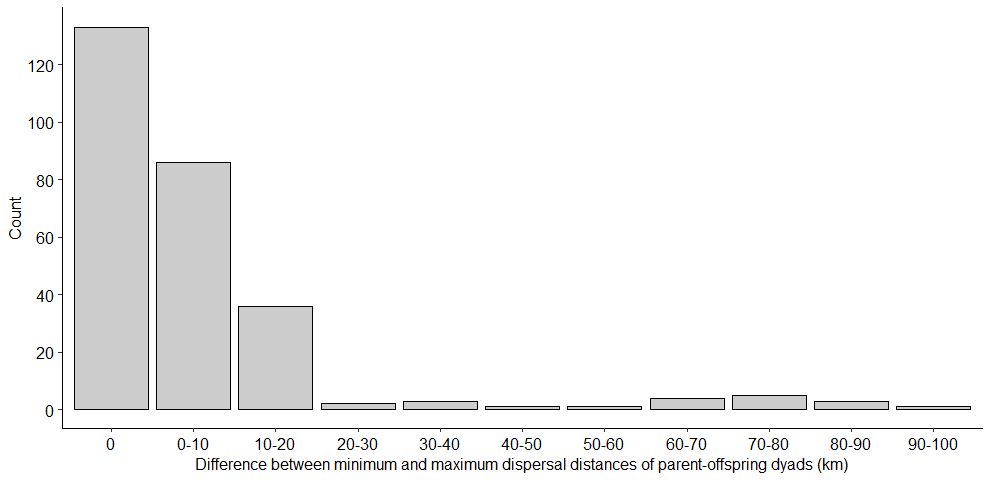


**Figure S2.1.** Difference in distance between the minimum and maximum dispersal distances of parent-offspring dyads. Most parent-offspring dyads had a range of dispersal distances within 0-20 km.


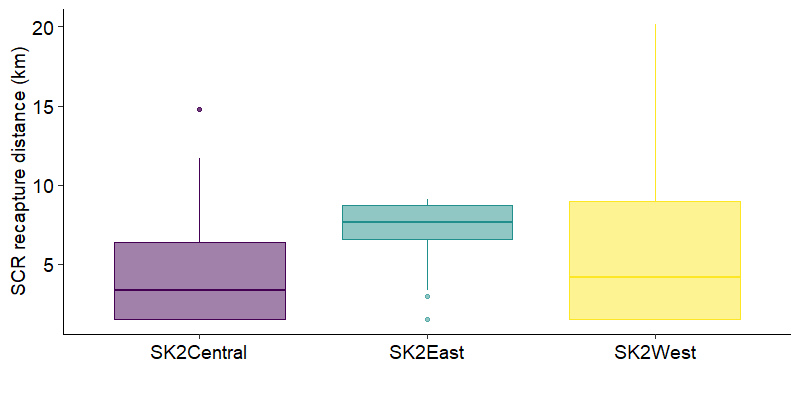


**Figure S2.2.** Distribution of spatial recapture distances in the three survey areas included in the multi-session SCR model.

## Density R code

library**(**secr**)**

library**(**rgdal**)**

library**(**raster**)**

# multi session/study area

setwd**(**"~/Saskatchewan/SK2"**)**

SK2total **<-** readOGR**(**dsn **=** "~/Saskatchewan/SK2", layer **=** "SK2_BorealPlains_Extrapolation"**)**

sk.caps.plains **<-** read.capthist**(**"captxy_plains_3sess.txt", trapfile **=** list**(**"detector_skcentral.txt", "Detector_SK2East.txt", "detector_skwest.txt"**)**, fmt **=** "trapID", detector **=** 'proximity', covnames **=** "Sex"**)**

# masks

SK2buffercentral **<-** readOGR**(**dsn **=** "~/Saskatchewan/SK2Central/R", layer **=** "SK_Polygons_20kmSK2_lakes"**)**

SK2buffereast **<-** readOGR**(**dsn **=** "~/Saskatchewan/SK2East/R", layer **=** "SK2East_Polygons_20km"**)**

SK2bufferwest **<-** readOGR**(**dsn **=** "~/Saskatchewan/SK2West/R", layer **=** "SK2West_Polygons_20km"**)**

plains **<-** readOGR**(**dsn **=** "~/Saskatchewan/SK2", layer **=** "SK2_BorealPlains_Extrapolation"**)**

maskcentral2019 **<-** make.mask**(**traps**(**sk.caps.plains**[[**1**]])**, type **=** "polygon", spacing **=** 1500, poly **=** SK2buffercentral, poly.habitat **=** T**)**

maskeast2020 **<-** make.mask**(**traps**(**sk.caps.plains**[[**2**]])**, type **=** "polygon", spacing **=** 1500, poly **=** SK2buffereast, poly.habitat **=** T**)**

maskwest2020 **<-** make.mask**(**traps**(**sk.caps.plains**[[**3**]])**, type **=** "polygon", spacing **=** 1500, poly **=** SK2bufferwest, poly.habitat **=** T**)**

plainsmask **<-** make.mask**(**traps**(**sk.caps.plains**)**, type **=** "polygon", spacing **=** 1500, poly **=** plains, poly.habitat **=** T**)**

conifer_raster **<-** raster**(**"~/Resample_CanLC_2015_1km.tif", band**=**2**)**

conifer **<-** scale**(**conifer_raster, center **=** **TRUE**, scale **=** **TRUE)**

conifer_poly **<-** as**(**conifer, "SpatialGridDataFrame"**)**

names**(**conifer_poly**)** **<-** "conifer"

maskcentral2019 **<-** addCovariates**(**maskcentral2019, conifer_poly**)**

maskeast2020 **<-** addCovariates**(**maskeast2020, conifer_poly**)**

maskwest2020 **<-** addCovariates**(**maskwest2020, conifer_poly**)**

plainsmask **<-** addCovariates**(**plainsmask, conifer_poly**)**

deciduous_raster **<-** raster**(**"~/Resample_CanLC_2015_1km.tif", band**=**3**)**

deciduous **<-** scale**(**deciduous_raster, center **=** **TRUE**, scale **=** **TRUE)**

deciduous_poly **<-** as**(**deciduous, "SpatialGridDataFrame"**)**

names**(**deciduous_poly**)** **<-** "deciduous"

maskcentral2019 **<-** addCovariates**(**maskcentral2019, deciduous_poly**)**

maskeast2020 **<-** addCovariates**(**maskeast2020, deciduous_poly**)**

maskwest2020 **<-** addCovariates**(**maskwest2020, deciduous_poly**)**

plainsmask **<-** addCovariates**(**plainsmask, deciduous_poly**)**

road.distance **<-** raster**(**"~/Saskatchewan/Chapter II Analysis/Data Layers/Final Layers/Linear Features/SK Interpolation/RoadsDistanceRaster_1000m.tif", verbose **=** **FALSE)**

road **<-** scale**(**road.distance, center **=** **TRUE**, scale **=** **TRUE)**

road_poly **<-** as**(**road, "SpatialGridDataFrame"**)**

names**(**road_poly**)** **<-** "road_distance"

maskcentral2019 **<-** addCovariates**(**maskcentral2019, road_poly**)**

maskeast2020 **<-** addCovariates**(**maskeast2020, road_poly**)**

maskwest2020 **<-** addCovariates**(**maskwest2020, road_poly**)**

plainsmask **<-** addCovariates**(**plainsmask, road_poly**)**

linear.distance **<-** raster**(**"~/Saskatchewan/Chapter II Analysis/Data Layers/Final Layers/Linear Features/SK Interpolation/LinearDistanceRaster_1000m_Clip2.tif", verbose **=** **FALSE)**

linear **<-** scale**(**linear.distance, center **=** **TRUE**, scale **=** **TRUE)**

linear_poly **<-** as**(**linear, "SpatialGridDataFrame"**)**

names**(**linear_poly**)** **<-** "linear_distance"

maskcentral2019 **<-** addCovariates**(**maskcentral2019, linear_poly**)**

maskeast2020 **<-** addCovariates**(**maskeast2020, linear_poly**)**

maskwest2020 **<-** addCovariates**(**maskwest2020, linear_poly**)**

plainsmask **<-** addCovariates**(**plainsmask, linear_poly**)**

sk.mask.plains **<-** list**(**maskcentral2019, maskeast2020, maskwest2020**)**

# models

m.plains.3sessNULL **<-** list**(**sk.caps.plains, mask **=** sk.mask.plains, model **=** list**(**DArialsession, lambda0Arialt**+**bk, sigmaArialt**+**bk**)**, detectfn **=** "HEX", trace **=** **FALSE**, method **=** "BFGS", CL **=** **FALSE)**

m.plains.3sess2 **<-** list**(**sk.caps.plains, mask **=** sk.mask.plains, model **=** list**(**DArialsession**+**conifer, lambda0Arialt**+**bk, sigmaArialt**+**bk**)**, detectfn **=** "HEX", trace **=** **FALSE**, method **=** "BFGS", CL **=** **FALSE)**

m.plains.3sess3 **<-** list**(**sk.caps.plains, mask **=** sk.mask.plains, model **=** list**(**DArialsession**+**conifer**+**deciduous, lambda0Arialt**+**bk, sigmaArialt**+**bk**)**, detectfn **=** "HEX", trace **=** **FALSE**, method **=** "BFGS", CL **=** **FALSE)**

m.plains.3sess12 **<-** list**(**sk.caps.plains, mask **=** sk.mask.plains, model **=** list**(**DArialsession**+**conifer**+**road_distance, lambda0Arialt**+**bk, sigmaArialt**+**bk**)**, detectfn **=** "HEX", trace **=** **FALSE**, method **=** "BFGS", CL **=** **FALSE)**

m.plains.3sess13 **<-** list**(**sk.caps.plains, mask **=** sk.mask.plains, model **=** list**(**DArialsession**+**conifer**+**deciduous**+**road_distance, lambda0Arialt**+**bk, sigmaArialt**+**bk**)**, detectfn **=** "HEX", trace **=** **FALSE**, method **=** "BFGS", CL **=** **FALSE)**

m.plains.3sess17 **<-** list**(**sk.caps.plains, mask **=** sk.mask.plains, model **=** list**(**DArialsession**+**conifer**+**linear_distance, lambda0Arialt**+**bk, sigmaArialt**+**bk**)**, detectfn **=** "HEX", trace **=** **FALSE**, method **=** "BFGS", CL **=** **FALSE)**

m.plains.3sess18 **<-** list**(**sk.caps.plains, mask **=** sk.mask.plains, model **=** list**(**DArialsession**+**conifer**+**deciduous**+**linear_distance, lambda0Arialt**+**bk, sigmaArialt**+**bk**)**, detectfn **=** "HEX", trace **=** **FALSE**, method **=** "BFGS", CL **=** **FALSE)**

m.plains.3sess31 **<-** list**(**sk.caps.plains, mask **=** sk.mask.plains, model **=** list**(**DArialsession**+**avghabitat, lambda0Arialt**+**bk, sigmaArialt**+**bk**)**, detectfn **=** "HEX", trace **=** **FALSE**, method **=** "BFGS", CL **=** **FALSE)**

m.plains.3sess32 **<-** list**(**sk.caps.plains, mask **=** sk.mask.plains, model **=** list**(**DArialsession**+**road_distance, lambda0Arialt**+**bk, sigmaArialt**+**bk**)**, detectfn **=** "HEX", trace **=** **FALSE**, method **=** "BFGS", CL **=** **FALSE)**

m.plains.3sess33 **<-** list**(**sk.caps.plains, mask **=** sk.mask.plains, model **=** list**(**DArialsession**+**linear_distance, lambda0Arialt**+**bk, sigmaArialt**+**bk**)**, detectfn **=** "HEX", trace **=** **FALSE**, method **=** "BFGS", CL **=** **FALSE)**

fits **<-** par.secr.fit**(**c**(**'m.plains.3sessNULL', 'm.plains.3sess2', 'm.plains.3sess3', 'm.plains.3sess12', 'm.plains.3sess13', 'm.plains.3sess17', 'm.plains.3sess18', 'm.plains.3sess31', 'm.plains.3sess32', 'm.plains.3sess33'**)**, ncores **=** 8, save.intermediate **=** **TRUE**, prefix **=** "emp", LB **=** **TRUE)**

# model selection

AIC1500 **<-** list.files**(**pattern **=** "^m.plains.3"**)**

**for** **(**i **in** 1**:**length**(**AIC1500**))** load**(**AIC1500**[[**i**]])**

datalistAIC **<-** mget**(**ls**(**pattern **=** "^m.plains.3"**))**

secrlist **<-** secrlist**(**datalistAIC**)**

AICtable **<-** AIC**(**secrlist**)**

surface_3sess **<-** predictDsurface**(**m.plains.3sess13, mask **=** plainsmask, cl.D **=** **TRUE)**

surface_rast_3sess **<-** raster**(**surface_3sess**$**Central2019, covariate **=** "D.0"**)**

proj4string**(**surface_rast_3sess**)** **<-** "+proj=lcc +lat_1=50 +lat_2=70 +lat_0=40 +lon_0=-96 +x_0=0 +y_0=0 +ellps=GRS80 +datum=NAD83 +units=m +no_defs"

writeRaster**(**surface_rast_3sess*****1E5, filename**=**"~/surface_multisess_plains", format**=**'GTiff', overwrite**=TRUE)**

## References

Borchers, D. L., and Efford, M. G. (2008). Spatially explicit maximum likelihood methods for capture-recapture studies. Biometrics, 64, 377–385. doi: [10.1111/j.1541-0420.2007.00927.x](https://doi.org/10.1111/j.1541-0420.2007.00927.x).

Efford, M. (2004). Density estimation in live-trapping studies. Oikos, 106, 598–610. doi: [10.1111/j.0030-1299.2004.13043.x](https://doi.org/10.1111/j.0030-1299.2004.13043.x).

Efford, M. G. (2011). Estimation of population density by spatially explicit capture-recapture analysis of data from area searches. Ecology, 92, 2202–2207. doi: [10.1890/11-0332.1](https://doi.org/10.1890/11-0332.1).

Efford, M. G., Dawson, D. K., & Borchers, D. L. (2009). Population density estimated from locations of individuals on a passive detector array. Ecology, 90, 2676–2682. doi: [10.1890/08-1735.1](https://doi.org/10.1890/08-1735.1).

ESRI Inc. (2018). ArcGIS 10.6.1. Available from <<https://support.esri.com/en/products/desktop/arcgis-desktop/arcmap/10-6-1>>.

Hijmans, R. J. (2022). Raster: Geographic Data Analysis and Modeling. Available from: < https://cran.r-project.org/package=raster>.

Natural Resources Canada. Data from: 2015 land cover of Canada. Natural Resources Canada. (2020). Available from <<https://open.canada.ca/data/en/dataset/4e615eae-b90c-420b-adee-2ca35896caf6>>.

Statistics Canada. (2015). Data from: National Road Network - NRN - GeoBase Series. Available from <<https://open.canada.ca/data/en/dataset/3d282116-e556-400c-9306-ca1a3cada77f>>.

# COLONY and GLM results

**Table S3.1.** Generalized linear model results for effect of density at parental location on dispersal distances of offspring. Results are for the entire population, as well as accounting for either the sex of the parent, or the sex of the offspring. *** indicates significant model results.

| Model | Estimate | SE | p-value |
| --- | --- | --- | --- |
| Maximum dispersal distance (all) | -209.197 | 98.247 | 0.034*** |
| Maximum dispersal distance (mothers and all offspring) | -211.28 | 114.856 | 0.068 |
| Maximum dispersal distance (fathers and all offspring) | -221.242 | 182.138 | 0.228 |
| Maximum dispersal distance (female offspring) | -112.105 | 154.74 | 0.47 |
| Maximum dispersal distance (male offspring) | -307.623 | 115.199 | 0.009*** |

**Table S3.2.** Generalized linear model results for effect of density at parental location on dispersal distances of offspring when accounting for the sex of both the parent and the offspring. *** indicates significant model results.

| Model | Estimate | SE | p-value |
| --- | --- | --- | --- |
| Maximum dispersal distance (mother-daughter) | -87.999 | 165.801 | 0.597 |
| Maximum dispersal distance (mother-son) | -378.371 | 159.452 | 0.021*** |
| Maximum dispersal distance (father-daughter) | -198.589 | 316.47 | 0.533 |
| Maximum dispersal distance (father-son) | -200.671 | 162.019 | 0.224 |

**Table S3.3.** Generalized linear model results for effect of density at parental location on individual fitness. *** indicates significant model results.

| Model | Estimate | SE | p-value |
| --- | --- | --- | --- |
| Individual fitness | -0.003 | 0.005 | 0.548 |
| Individual fitness (females) | -0.012 | 0.006 | 0.043*** |
| Individual fitness (males) | 0.019 | 0.009 | 0.038*** |

**Table S3.4.** Generalized linear model results for effect of density on network centrality of individuals. *** indicates significant model results.

| Model | Estimate | SE | Comparison to permutations |
| --- | --- | --- | --- |
| Alpha centrality | -9.30e-05 | 1.19e-04 | 0.436 |
| Closeness centrality | -1.47e-03 | 3.11e-04 | 0*** |
| Degree centrality | -1.60e-04 | 1.42e-04 | 0.167 |
| Female alpha centrality | -3.04e-04 | 1.52e-04 | 0.196 |
| Male alpha centrality | 3.04e-04 | 1.91e-04 | 0.441 |
| Female closeness centrality | -1.77e-03 | 3.73e-04 | 0.001*** |
| Male closeness centrality | -9.34e-04 | 5.53e-04 | 0.101 |
| Female degree centrality | -4.36e-04 | 1.75e-04 | 0.003*** |
| Male degree centrality | 3.61e-04 | 2.40e-04 | 0.83 |

Figure S3.1: Boreal caribou familial network. Node size indicates closeness centrality score. Node colour represents median density where that individual was located. White nodes indicate inferred individuals where density could not be estimated.

Figure S3.1: Boreal caribou familial network. Node size indicates closeness centrality score. Node colour represents median density where that individual was located. White nodes indicate inferred individuals where density could not be estimated.


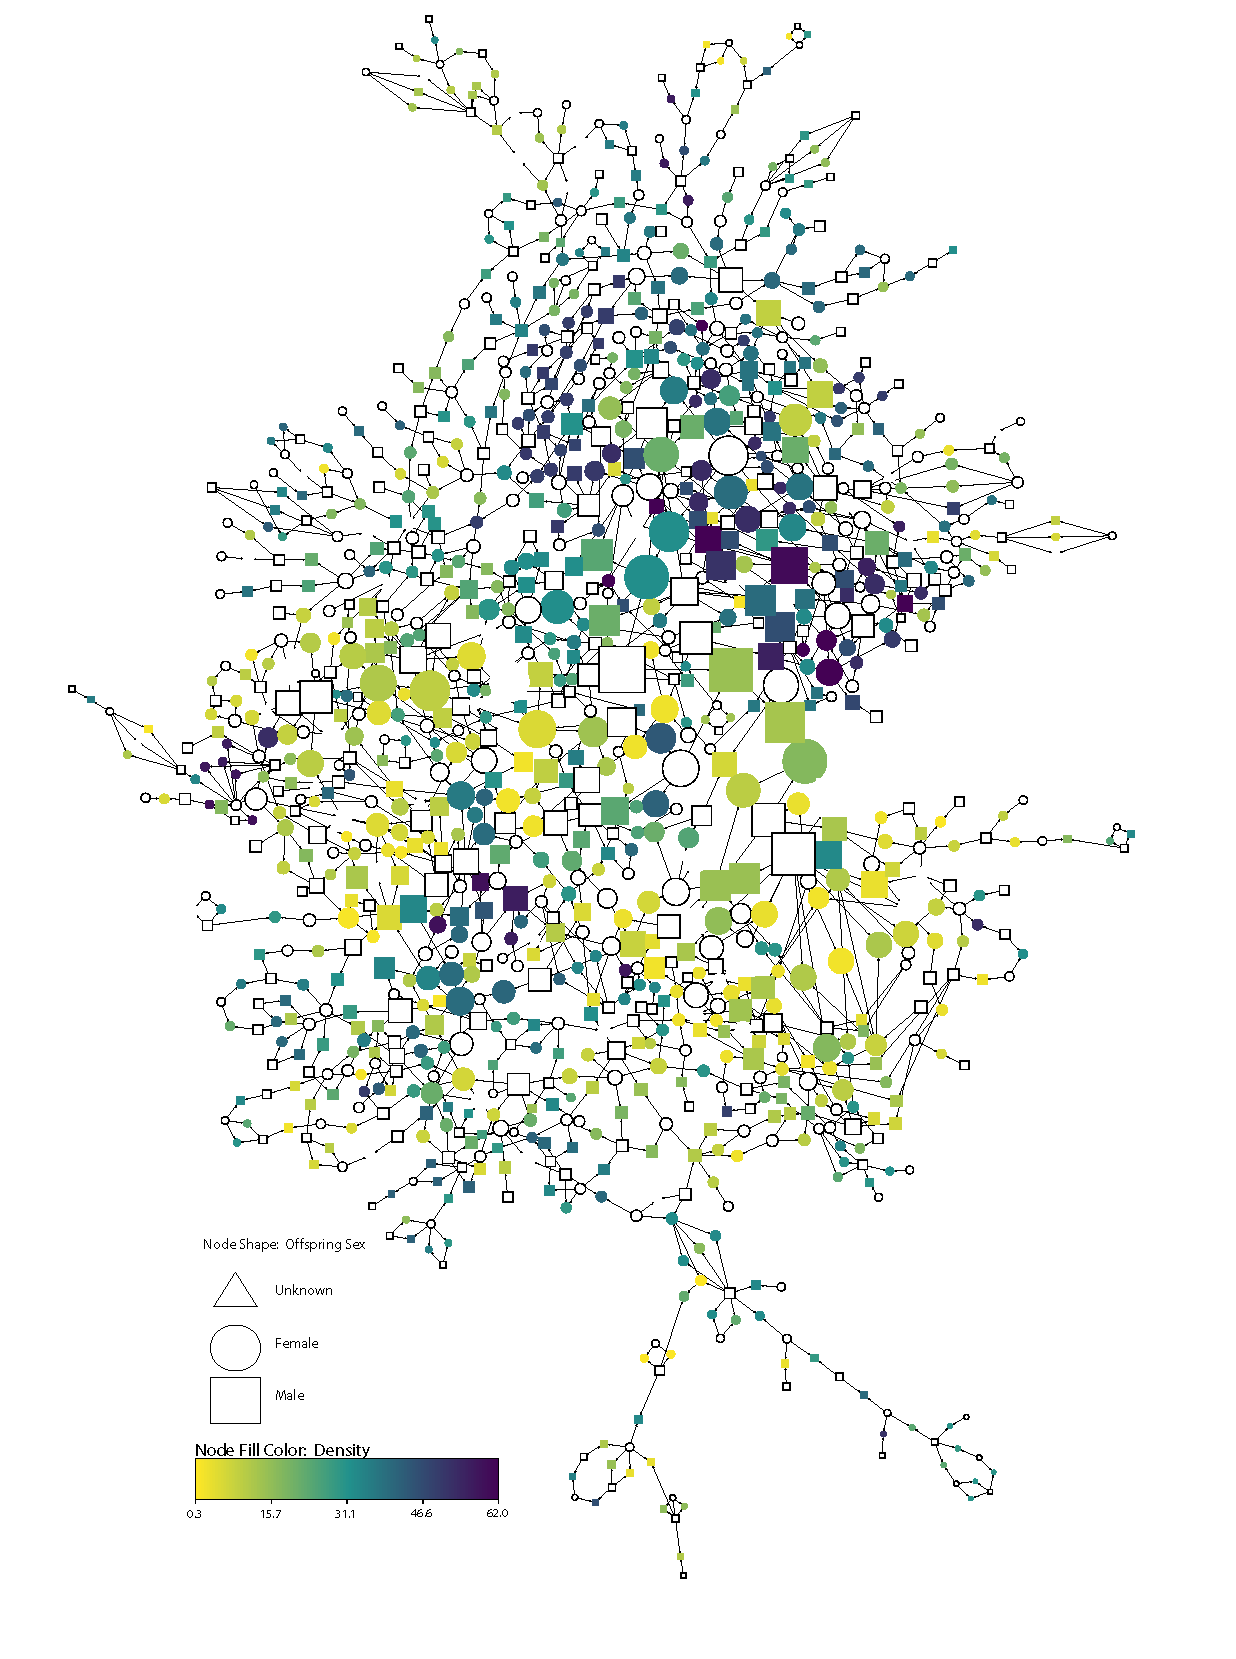


**Figure S3.1.** Boreal caribou familial network. Node size indicates closeness centrality score. Node colour represents median density where that individual was located. White nodes indicate inferred individuals where density could not be estimated.


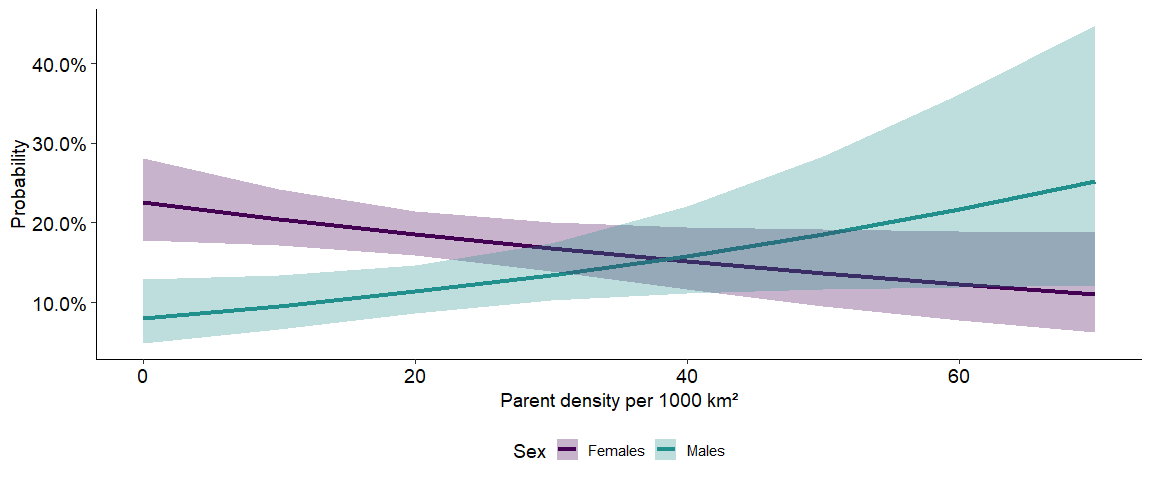


**Figure S3.2.** Marginal effects of the effect of density on the probability of having an offspring for females and males.


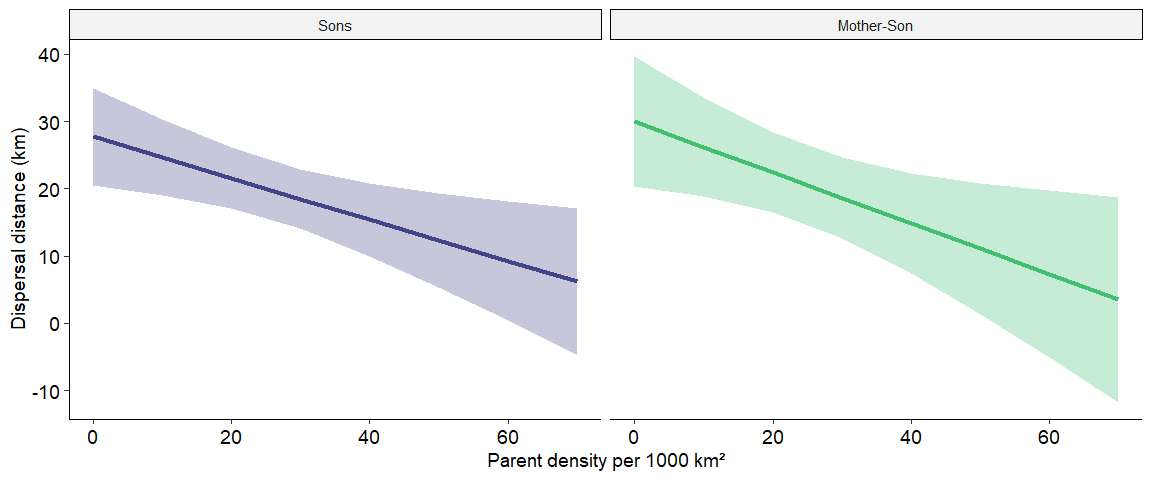


**Figure S3.3.** Marginal effects of the effect of parental density on the dispersal distance of offspring for sons and mother-son pairs.

# Network centrality results

Overall, alpha centrality ranged from 1 to 21 with a mean of 2.79 ( 2.79 SD), degree centrality ranged from 1 to 13 with a mean of 2.49 ( 1.18 SD) and closeness centrality ranged from 46.63 to 135.75 with a mean of 90.08 ( 15.69 SD).

Permuted networks were also run to determine the effect of density on alpha centrality (Figure S4.1).


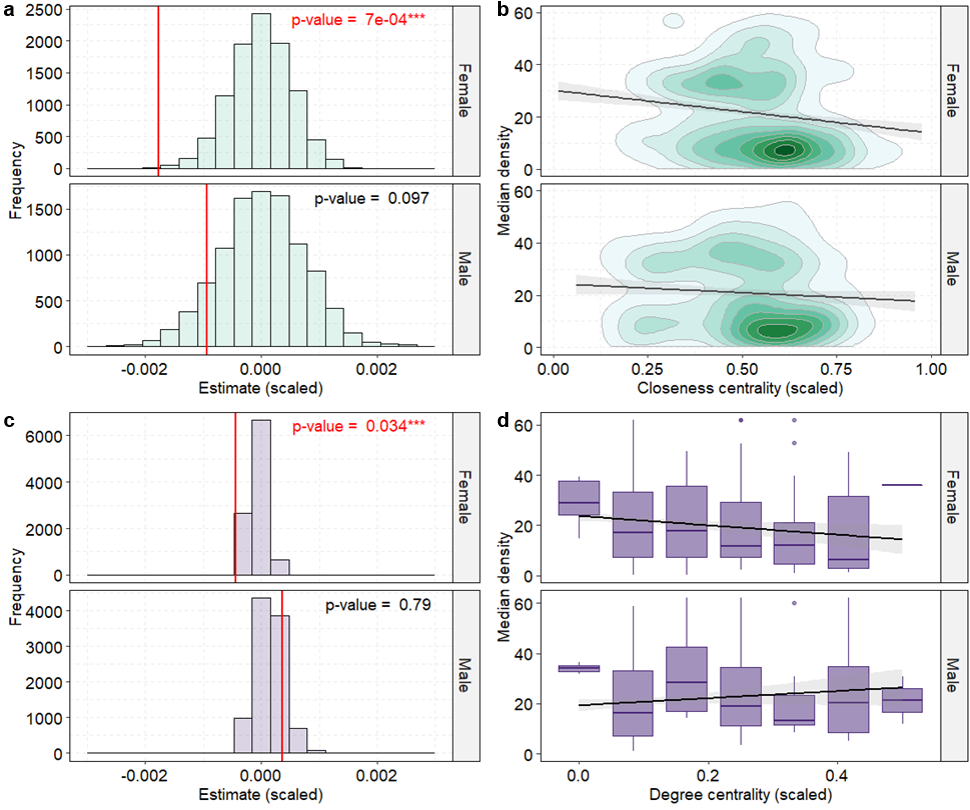


**Figure S4.1.** Sex-specific results of the effect of density on individual closeness centrality (a,b) and degree centrality (c,d). Histograms comparing closeness centrality (a) and degree centrality (c) of the real network to randomized networks, showing the observed model estimate of the actual network (vertical line) compared to 10,000 randomized networks. Significant p-values shown in red. Distributions of closeness centrality (b) and degree centrality (d) versus median density per individual. The 2D density plot represents the combined distribution of the two variables.


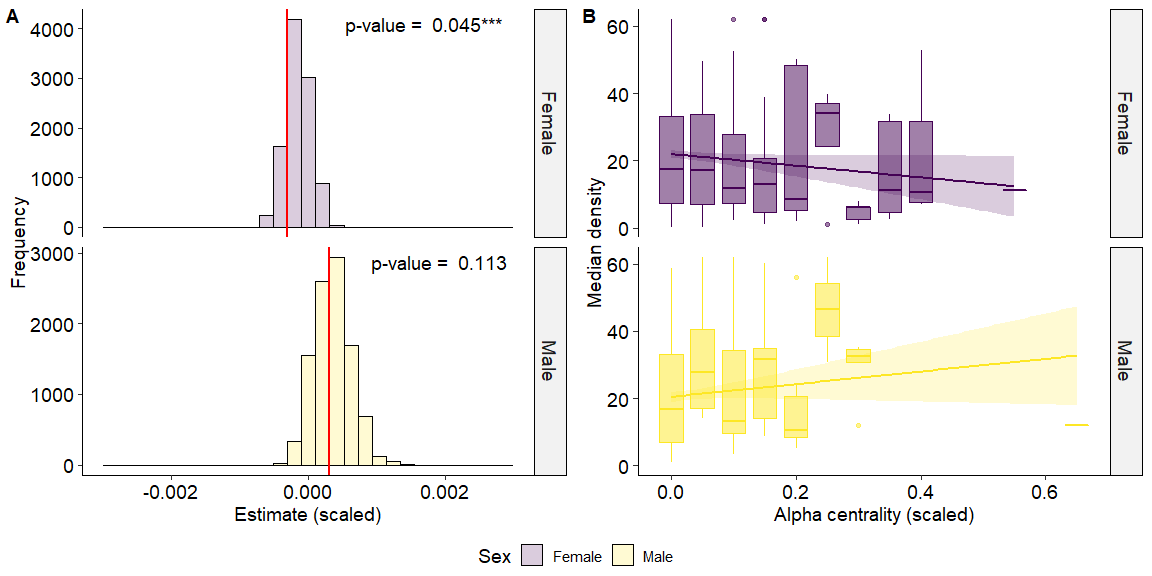


**Figure S4.2.** Sex-specific results of the effect of density on individual alpha centrality: both sexes (not significant), females (significant), and males (not significant). (A) Histogram comparing alpha centrality of the real network to randomized networks, showing the observed model estimate of the actual network (vertical line) compared to 10,000 randomized networks. Significant p-values shown in red. (B) Distribution of alpha centrality versus median density per individual.

# Reproductive success and pregnancy

460 fecal samples from 363 female caribou were analyzed for pregnane concentrations (ng/g dry mass) to determine pregnancy status. When a female was sampled during more than one year, one sample per year was sent for analysis to assess yearly pregnancy status. A threshold of 700 ng/g was used to determine pregnancy. A summary of pregnancy results by sampling area and sampling year are shown in Table S5.1. The average pregnancy rate for all areas and years was 78%, ranging from 71% to 87%.

In all analyses, the number of offspring was transformed into binary format (0 = no offspring, 1 = one or more offspring). More than 75% of sampled females and males did not have any offspring (Figure S5.1). When including the inferred individuals from the pedigree reconstruction, more than 50% of females and males did not have any offspring (Figure S5.2).

**Table S5.1.** Pregnane results

|  | Sample year | Number of samples analyzed | Proportion of pregnant females |
| --- | --- | --- | --- |
| Flin Flon | 2014 | 54 | 0.78 |
| La Ronge | 2013 | 67 | 0.72 |
| SK Central | 2017 | 87 | 0.71 |
| SK Central | 2018 | 65 | 0.75 |
| SK Central | 2019 | 77 | 0.87 |
| SK East | 2020 | 31 | 0.84 |
| SK West | 2020 | 79 | 0.77 |
| **Total** | **-** | **460** | **0.78** |


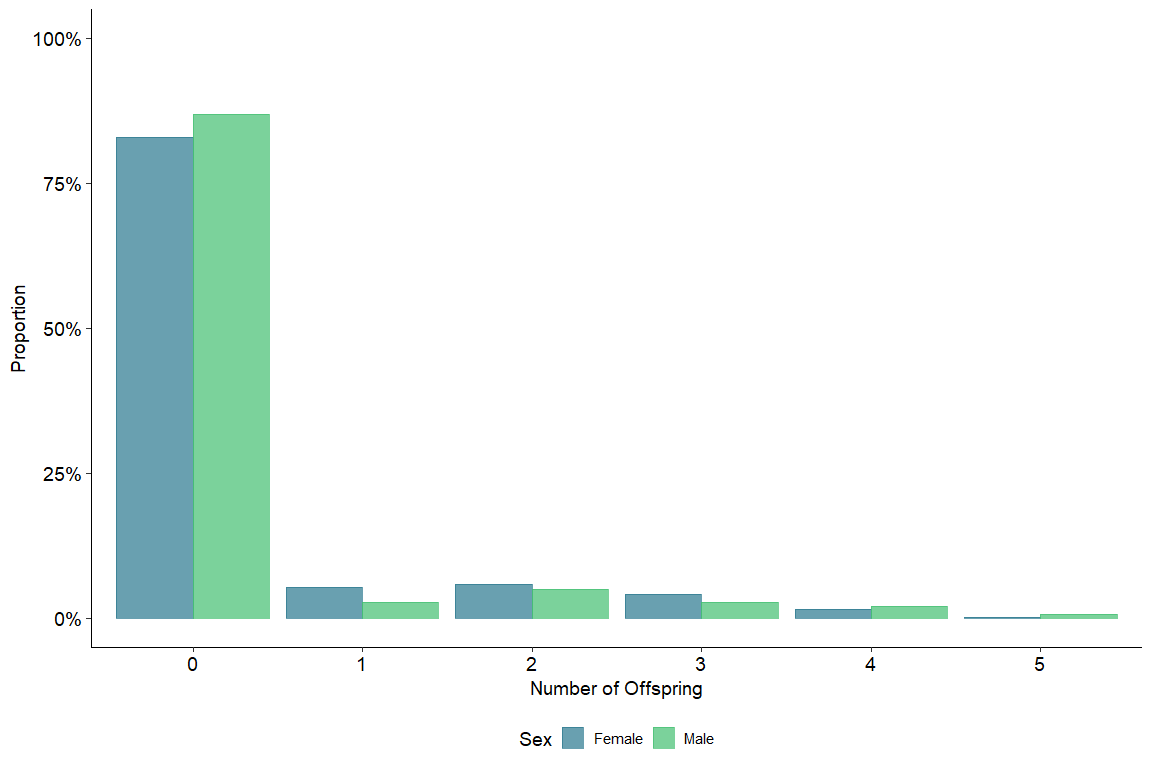


**Figure S5.1.** Number of offspring per sampled individual by frequency of females and frequency of males.


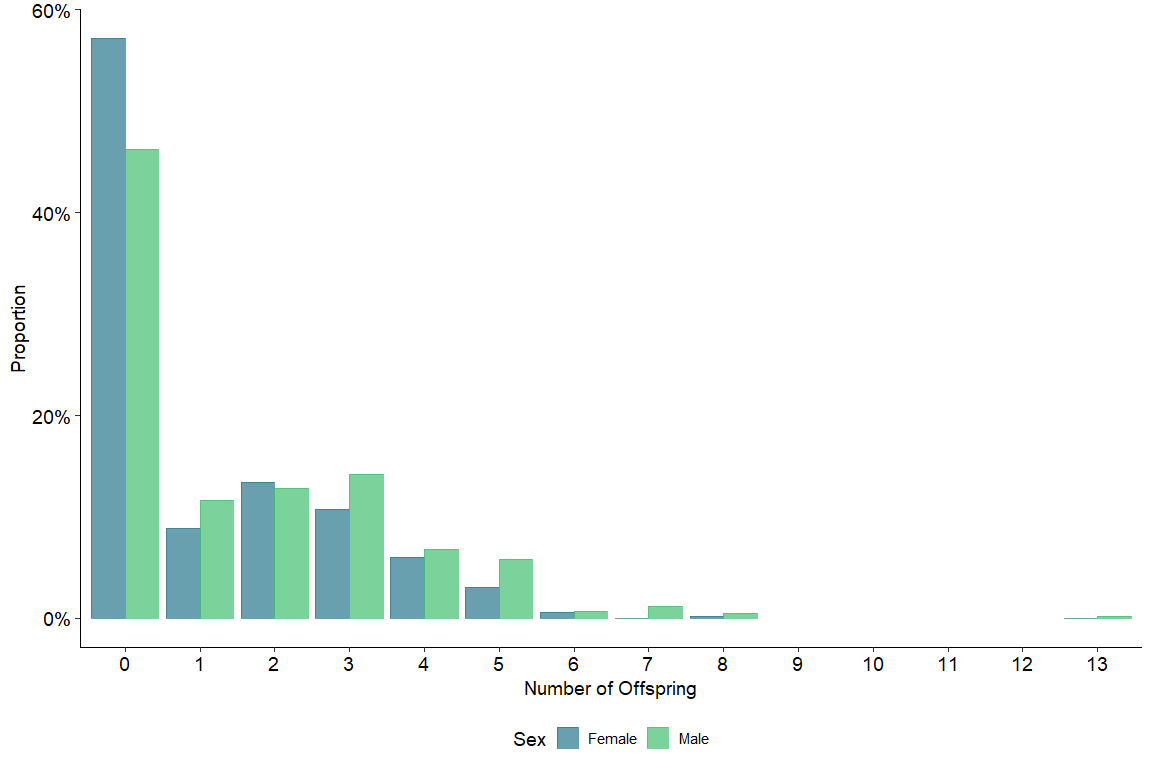


**Figure S5.2.** Number of offspring per individual (sampled and inferred individuals) by frequency of females and frequency of males.
